# Supplementary material for: Your wish is my command! The influence of symbolic modelling on preschool children’s delay of gratification
Source: PeerJ. 2015 Feb 17;3:e774. doi: 10.7717/peerj.774 (PMC4338768; doi:10.7717/peerj.774)
Supplement: Supplemental Information 1 [file peerj-03-774-s001.xlsx]

## Sheet: SPSS
ref	age	gender	condition	pre	post	Q1	Q2	Q3	Q2&3	mean_time
1	36.23	1	1	0.05	0.02	0.722222	2.5	2.5	2.5	0.035
7	35.09	1	1	15	15	0.83	2.5	2.78	2.64	15
13	37.17	1	1	6.56	7.53	0.67	1.89	2.39	2.13	7.045
19	37.12	1	1	2.12	15	0.72	2.83	2.67	2.75	8.56
25	38.24	1	1	15	15	0.67	2.89	2.44	2.67	15
31	35.11	1	1	0.07	15	0.38	1.72	1.66	1.69	7.535
37	37	1	1	15	15	0.66	2.55	3.11	2.83	15
43	34.09	1	1	1.09	0.36	0.55	2.72	2.72	2.72	0.725
49	36.05	1	1	4.09	15	0.77	2.88	2.88	2.88	9.545
55	39.25	1	1	15	15	0.77	3.44	3.33	3.38	15
61	31.04	1	1	15	15	0.072	2.94	2.33	2.63	15
67	39.23	1	1	13.01	3.5	0.083	3	3.27	3.13	8.255
73	30.3	1	1	15	0.52	0.55	2.05	2.33	2.19	7.76
79	31.18	1	1	5.06	1.2	0.27	1.55	1.5	1.52	3.13
85	30.25	1	1	0.1	4.04	0.27	1.55	1.77	1.66	2.07
3	35	1	2	0.31	15	0.78	3.22	3.16	3.19	7.655
9	37.08	1	2	3.5	1.57	0.44	2.05	2.22	2.13	2.535
15	37.16	1	2	3.01	15	0.5	2.38	2.44	2.41	9.005
21	36.08	1	2	15	5.52	0.72	3.16	2.83	3	10.26
27	34.19	1	2	15	12.57	0.89	1.89	2.38	2.14	13.785
33	35.05	1	2	15	15	1	4.27	5	4.63	15
39	35.11	1	2	1.33	15	0.44	1.77	2.22	2	8.165
45	34.06	1	2	15	1.55	0.38	1.89	2.22	2.05	8.275
51	30.17	1	2	15	15	0.44	2	2.38	2.19	15
57	36.08	1	2	0.07	0.08	0.55	2.33	2.5	2.41	0.075
69	31.17	1	2	14.35	15	0.33	1.77	1.88	1.83	14.675
75	32.03	1	2	0.01	0.03	0.83	2.94	3.33	3.13	0.02
81	31.04	1	2	3.31	8.35	0.66	2.83	2.88	2.86	5.83
87	31.1	1	2	15	15	0.77	2.5	2.88	2.69	15
93	30.26	1	2	15	15	0.5	1.88	2.27	2.08	15
5	37.01	1	3	3.58	15	0.78	3.89	3.11	3.5	9.29
11	34.14	1	3	15	15	0.67	2.78	2.56	2.67	15
17	36.16	1	3	3.56	3.35	0.33	1.72	2.166	1.94	3.455
23	36.25	1	3	15	15	0.77	3.11	2.67	2.89	15
29	35.05	1	3	1.34	0.15	0.77	3.05	3.27	3.16	0.745
35	35.27	1	3	2.25	0.09	0.27	1.94	2	1.97	1.17
41	36.12	1	3	15	15	0.66	2.83	3.11	2.97	15
47	35.29	1	3	15	11.15	0.72	2.61	3.22	2.91	13.075
53	36.07	1	3	15	15	0.77	2.88	3	2.91	15
59	39.18	1	3	4.49	8.54	0.66	2.83	2.88	2.86	6.515
71	32.29	1	3	15	15	0.66	2.66	3.05	2.86	15
77	31.19	1	3	0.45	1.13	0.83	2.88	2.88	2.88	0.79
83	39.2	1	3	15	14.09	0.72	2.27	2.88	2.58	14.545
95	30.29	1	3	15	10.57	0.61	2.88	2.94	2.91	12.785
101	31.02	1	3	7.58	1.09	0.5	1.61	1.61	1.61	4.335
107	30.22	1	3	15	15	0.66	2.77	2.72	2.75	15
8	36.08	2	1	15	15	0.67	2.44	2.61	2.52	15
14	34.22	2	1	9.44	14.26	0.44	2	2.05	2.03	11.85
20	36.29	2	1	12.47	15	0.55	2.11	1.94	2.02	13.735
26	37.27	2	1	0.5	0.58	0.66	2.38	2.94	2.66	0.54
32	35.17	2	1	9.17	3.06	0.72	3.55	4.05	3.8	6.115
38	34.05	2	1	15	15	0	1.44	2.11	1.77	15
44	39.27	2	1	11.26	10.31	0.61	2.5	2.55	2.53	10.785
50	32.21	2	1	2.22	0.24	0.5	1.83	1.44	1.63	1.23
56	32.25	2	1	4.5	0.03	0.44	2.22	2.55	2.38	2.265
62	31.3	2	1	6.15	0.22	0.61	2.66	2.55	2.61	3.185
68	30.28	2	1	0.01	9.3	0.05	1.16	1.22	1.19	4.655
74	31.11	2	1	6.57	1.59	0.55	2.22	2.22	2.22	4.08
4	37.13	2	2	1.22	0.1	0.94	2.77	2.94	2.86	0.66
10	35.29	2	2	5.02	0.28	0.5	2	2.22	2.11	2.65
16	36.22	2	2	8.23	15	0.061	2.5	2.78	2.64	11.615
22	34.08	2	2	15	15	0.61	2.67	2.56	2.61	15
28	35.17	2	2	15	15	0.72	2.61	3.22	2.91	15
34	36.03	2	2	0.51	0.08	0.61	2.66	2.72	2.69	0.295
40	32.28	2	2	15	15	0.5	2.11	2.38	2.25	15
46	32.22	2	2	0.08	1.1	0.44	1.83	2.38	2.11	0.59
52	32.14	2	2	0.15	0.01	0.11	1.11	1.44	1.27	0.08
58	32.18	2	2	0.07	0.11	0	1	1	1	0.09
64	31.06	2	2	2.47	5.48	0.05	1.05	1.22	1.14	3.975
70	31.02	2	2	0.3	0.04	0.22	2.33	2.27	2.3	0.17
6	37.24	2	3	0.25	0.02	0.61	2	2.67	2.33	0.135
12	35.11	2	3	0.02	0.23	0.05	1.16	1.16	1.16	0.125
18	35.18	2	3	2.12	0.08	0.11	1.22	1.22	1.22	1.1
24	34.17	2	3	0.08	0.04	0.66	3	2.83	2.91	0.06
30	36.02	2	3	14.07	9.3	0.55	2.22	2.77	2.5	11.685
36	34.07	2	3	6.43	0.04	0.061	2.83	2.38	2.61	3.235
42	36.02	2	3	15	15	0.83	2.94	3.27	3.11	15
48	31.18	2	3	15	15	0.55	2.83	3.16	3	15
54	32.05	2	3	0.02	0.02	0.5	2.22	2.22	2.22	0.02
60	31.25	2	3	5.28	15	0.05	1.22	1.22	1.22	10.14
66	31.15	2	3	15	2.14	0.77	2.61	2.72	2.66	8.57
72	31.11	2	3	7.4	15	0.61	2.61	2.94	2.77	11.2
78	30.28	2	3	1.53	4	0.61	2.33	2.66	2.5	2.765
